# Supplementary figures and images for: Plant Core Environmental Stress Response Genes Are Systemically Coordinated during Abiotic Stresses
Source: MDPI journal article supplement (doi:10.3390/ijms14047617), 2013-04-08

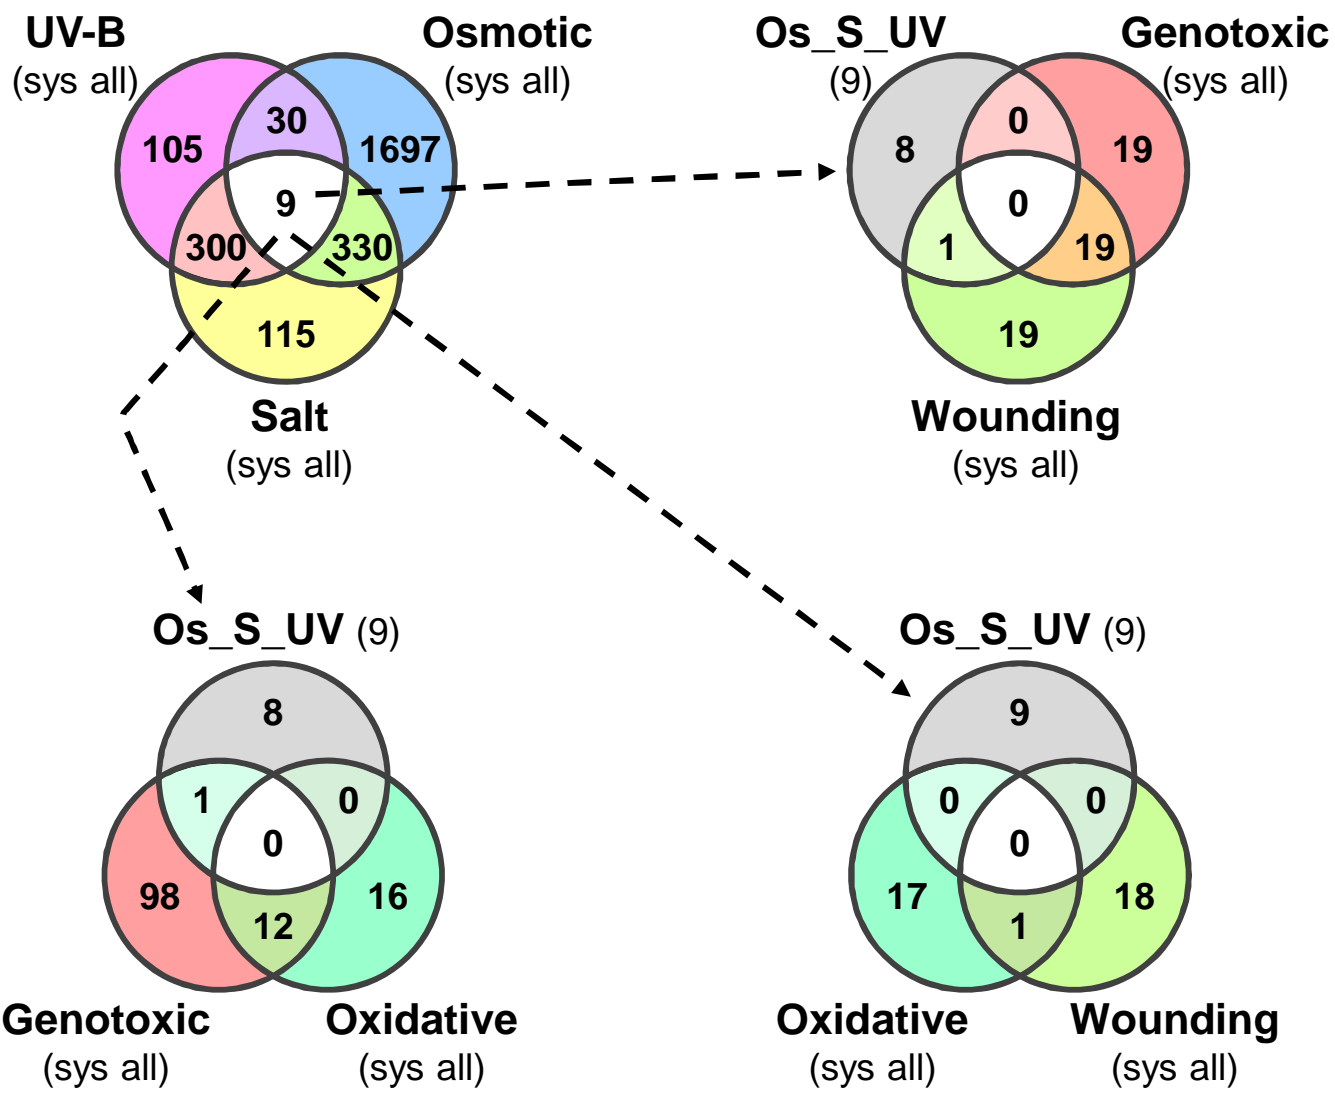

Supplement: s1 [file s1]
